# Supplementary material
Source: ML conference proceedings conference paper supplement (https://openaccess.thecvf.com/content/cvpr_2017/html/Kalogerakis_3D_Shape_Segmentation_2017_CVPR_paper.html)
Supplement: Supplementary file 1 [file Kalogerakis_3D_Shape_Segmentation_2017_CVPR_supplemental.pdf]

# 3D Shape Segmentation with Projective Convolutional Networks - Supplementary Material -

Evangelos Kalogerakis<sup>1</sup>   Melinos Averkiou<sup>2</sup>   Subhansu Maji<sup>1</sup>   Siddhartha Chaudhuri<sup>3</sup>

<sup>1</sup>University of Massachusetts Amherst   <sup>2</sup>University of Cyprus   <sup>3</sup>IIT Bombay

## 1. Evaluation in PSB/COSEG

The labeling accuracy of our method (ShapePFCN), ShapeBoost [2] and Guo et al. [1] per category is presented in Table 1. Aggregate performance is shown in Table 2. The labeling accuracy for a shape is measured as the percentage of surface area labeled correctly according to the ground-truth face labeling provided in the L-PSB [2] and COSEG [3] datasets. Please see our paper for more discussion.

## 2. ShapeBoost results on RGB-D sensor data

We applied ShapeBoost on the same objects used in Figure 4 of our paper. The method failed to produce compelling results - see Figure 1 below, and compare with the results of our method shown in Figure 4 of our paper. We suspect that the underlying reason for these failure cases of ShapeBoost (and in general methods that rely on hand-engineered geometric descriptors) is that noise, holes, and mesh degeneracies easily distort geometric descriptors. Another potential reason is that shallow classifiers tend to underfit datasets of shapes with significant variability.

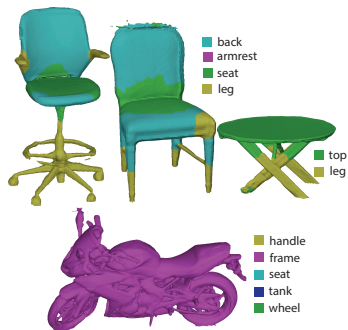

Figure 1. Labeled segmentations produced by ShapeBoost on noisy objects reconstructed from RGBD sensor data.

## 3. Additional data

In our supplementary material and project page (see: <http://people.cs.umass.edu/kalo/papers/shapepfcn/>), we provide visualizations of segmentations produced by our method, ShapeBoost [2] and Guo et al. [1] on our test shapes from ShapeNetCore, PSB and COSEG. We also provide a text file (*splits.txt*) that includes the training and test splits we used in our experiments.

|                  | #train/test shapes | #part labels | ShapeBoost | Guo et al. | ShapePFCN |
|------------------|--------------------|--------------|------------|------------|-----------|
| psbAirplane      | 12 / 8             | 5            | 96.1       | 91.6       | 93.0      |
| psbAnt           | 12 / 8             | 5            | 98.7       | 97.6       | 98.6      |
| psbArmadillo     | 12 / 8             | 11           | 92.6       | 85.0       | 92.8      |
| psbBearing       | 12 / 8             | 5            | 92.2       | 77.4       | 92.3      |
| psbBird          | 12 / 8             | 5            | 89.6       | 83.1       | 88.5      |
| psbBust          | 12 / 8             | 8            | 63.4       | 34.8       | 68.4      |
| psbChair         | 12 / 8             | 4            | 98.1       | 96.7       | 98.5      |
| psbCup           | 12 / 8             | 2            | 94.0       | 92.1       | 93.8      |
| psbFish          | 12 / 8             | 3            | 95.7       | 94.5       | 96.0      |
| psbFourLeg       | 12 / 8             | 6            | 83.3       | 82.4       | 85.0      |
| psbGlasses       | 12 / 8             | 3            | 96.9       | 95.3       | 96.6      |
| psbHand          | 12 / 8             | 6            | 94.4       | 73.8       | 84.8      |
| psbHuman         | 12 / 8             | 8            | 86.8       | 85.6       | 94.5      |
| psbMech          | 12 / 8             | 5            | 99.5       | 98.5       | 98.7      |
| psbOctopus       | 12 / 8             | 2            | 98.2       | 97.4       | 98.3      |
| psbPlier         | 12 / 8             | 3            | 95.2       | 95.2       | 95.5      |
| psbTable         | 12 / 8             | 2            | 99.4       | 98.5       | 99.5      |
| psbTeddy         | 12 / 8             | 5            | 98.7       | 97.3       | 97.7      |
| psbVase          | 12 / 8             | 5            | 81.7       | 77.8       | 86.8      |
| cosegCandelabra  | 12 / 16            | 4            | 85.5       | 85.9       | 95.4      |
| cosegChairs      | 12 / 8             | 3            | 94.8       | 93.8       | 96.1      |
| cosegFourleg     | 12 / 8             | 5            | 92.3       | 88.2       | 90.4      |
| cosegGoblets     | 6 / 6              | 3            | 97.0       | 86.1       | 97.2      |
| cosegGuitars     | 12 / 32            | 3            | 97.7       | 97.7       | 98.0      |
| cosegIrons       | 12 / 6             | 3            | 87.2       | 79.7       | 88.0      |
| cosegLamps       | 12 / 8             | 3            | 76.3       | 78.0       | 93.0      |
| cosegVases       | 12 / 16            | 4            | 86.4       | 84.4       | 84.8      |
| cosegVasesLarge  | 12 / 288           | 4            | 89.7       | 80.1       | 90.6      |
| cosegChairsLarge | 12 / 388           | 3            | 76.5       | 80.8       | 91.1      |
| cosegTeleAliens  | 12 / 188           | 4            | 81.7       | 80.0       | 95.7      |

Table 1. Dataset statistics and labeling accuracy per category for test shapes in PSB & COSEG.

|                           | ShapeBoost | Guo et al. | ShapePFCN   |
|---------------------------|------------|------------|-------------|
| Category Avg.             | 90.6       | 86.3       | <b>92.6</b> |
| Category Avg. (>3 labels) | 89.5       | 83.3       | <b>90.9</b> |
| Dataset Avg.              | 84.2       | 82.1       | <b>92.2</b> |
| Dataset Avg. (>3 labels)  | 87.2       | 81.0       | <b>92.1</b> |

Table 2. Aggregate labeling accuracy on PSB & COSEG.

## References

- [1] K. Guo, D. Zou, and X. Chen. 3D mesh labeling via deep convolutional neural networks. *Trans. Graph.*, 35(1):3:1–3:12, 2015. [1](#)
- [2] E. Kalogerakis, A. Hertzmann, and K. Singh. Learning 3D mesh segmentation and labeling. *Trans. Graph.*, 29(4):102:1–102:12, 2010. [1](#)
- [3] Y. Wang, S. Asafi, O. van Kaick, H. Zhang, D. Cohen-Or, and B. Chen. Active co-analysis of a set of shapes. *Trans. Graph.*, 31(6):165:1–165:10, 2012. [1](#)
